# Supplementary material
Source: publisher figshare collection journal article supplement (https://tandf.figshare.com/ndownloader/files/14198282)
Supplement: Supplementary file 1 [file 14198282]

Nano catalytic synthesis of flavanone phosphonates using domino Knoevenagel-phospha-Michael route

**Maryam Zarei, Soheila Ghassamipour***

Department of Chemistry, Marvdasht Branch, Islamic Azad University, Marvdasht, Iran

Email: soheilaghassamipour@miau.ac.ir

**Supplemental Materials**

**
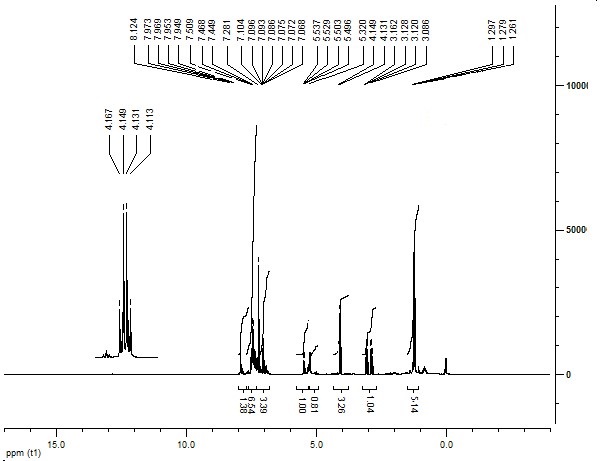
**

**Figure S 1:** 1H-NMR of Diethyl (3,4-dihydro-4-oxo-2-phenyl-2H-chromen-3-yl) (phenyl) methylphosphonate


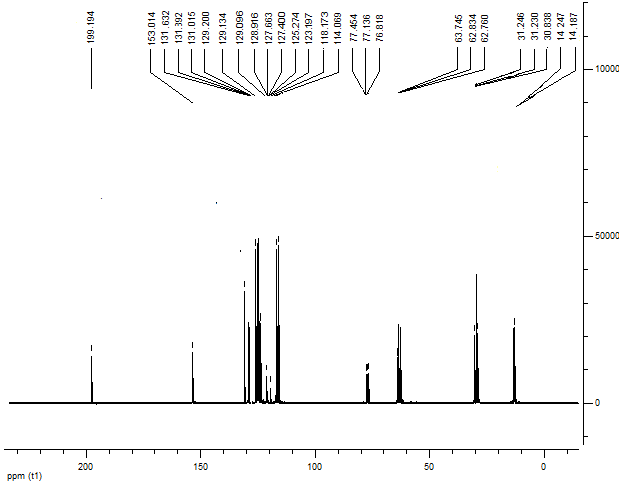


**Figure S 2:** 13C-NMR of Diethyl (3,4-dihydro-4-oxo-2-phenyl-2H-chromen-3-yl) (phenyl)methylphosphonate

**
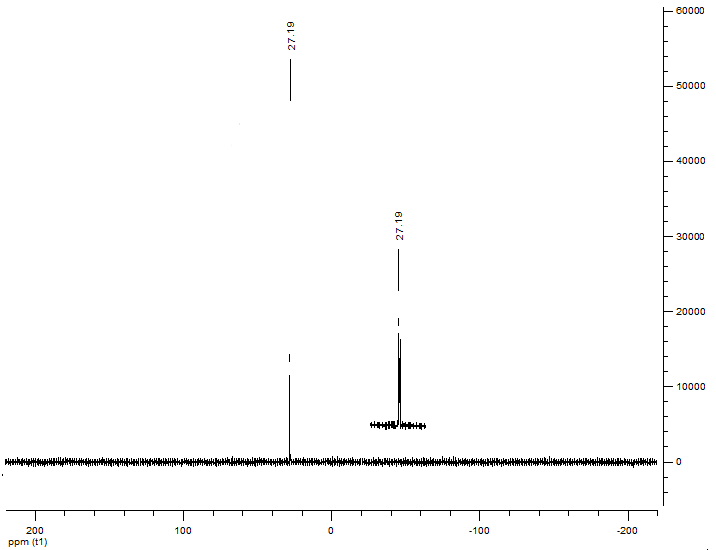
**

**Figure S 3:** 31P-NMR of Diethyl (3,4-dihydro-4-oxo-2-phenyl-2H-chromen-3-yl) (phenyl)methylphosphonate

**
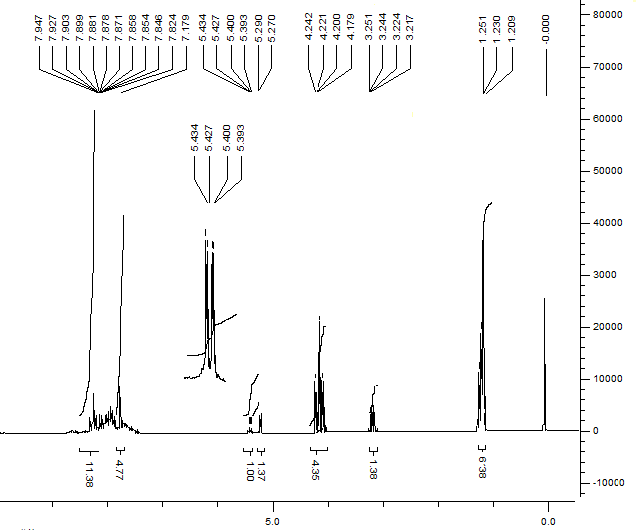
**

**Figure S 4:** 1H-NMR of Diethyl (naphthalen-1-yl)(4-oxo-2-phenylchroman-3-yl) methylphosphonate


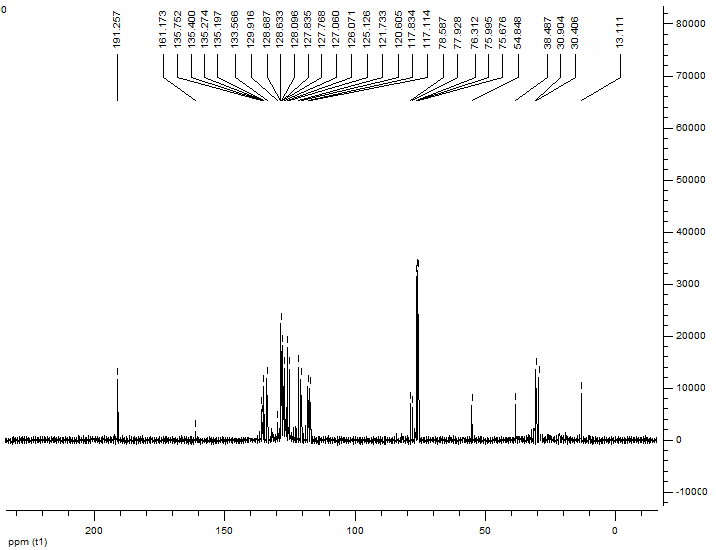


**Figure S 5:** 13C-NMR of Diethyl (naphthalen-1-yl)(4-oxo-2-phenylchroman-3-yl) methylphosphonate

**
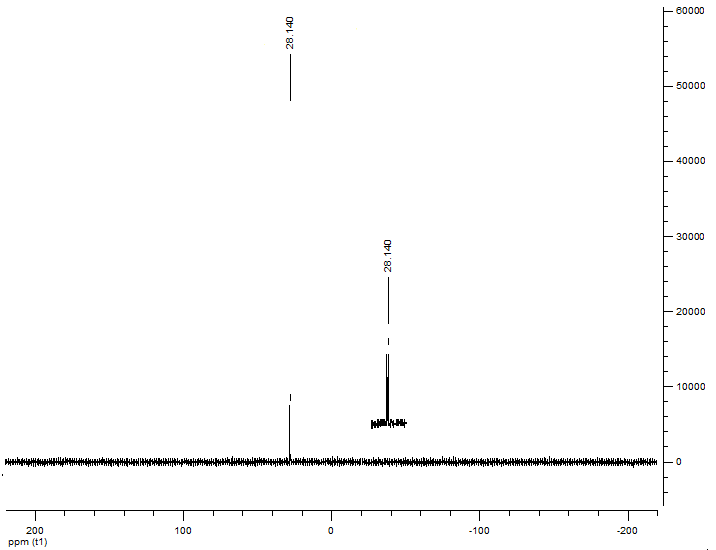
**

**Figure S 6:** 31P-NMR of Diethyl (naphthalen-1-yl)(4-oxo-2-phenylchroman-3-yl) methylphosphonate

**
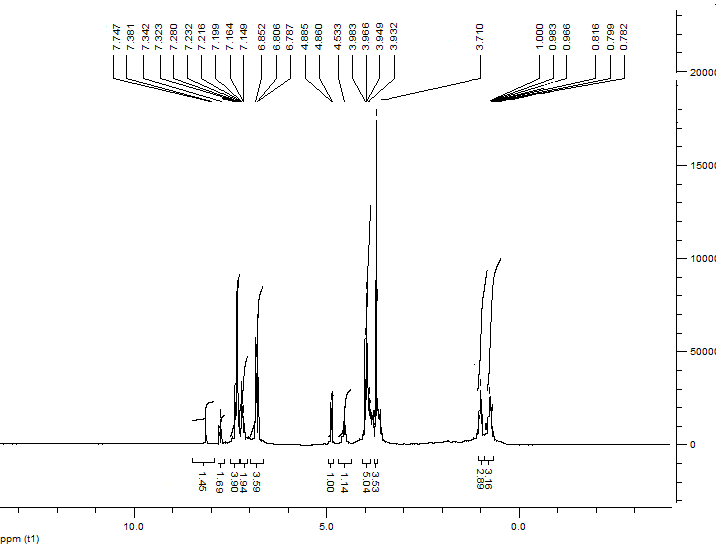
**

**Figure S 7:** 1H-NMR of Diethyl (3,4-dihydro-4-oxo-2-phenyl-2H-chromen-3-yl)(4-methoxyphenyl)methyl phosphonate

**
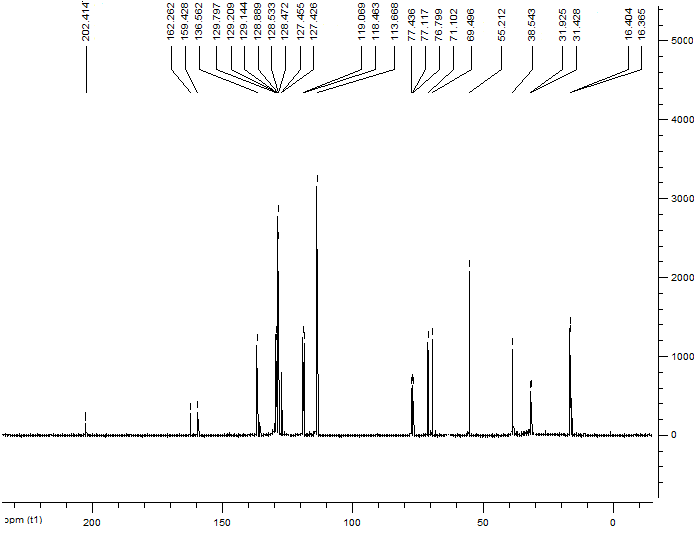
**

**Figure S 8:** 13C-NMR of Diethyl (3,4-dihydro-4-oxo-2-phenyl-2H-chromen-3-yl)(4-methoxyphenyl)methyl phosphonate

**
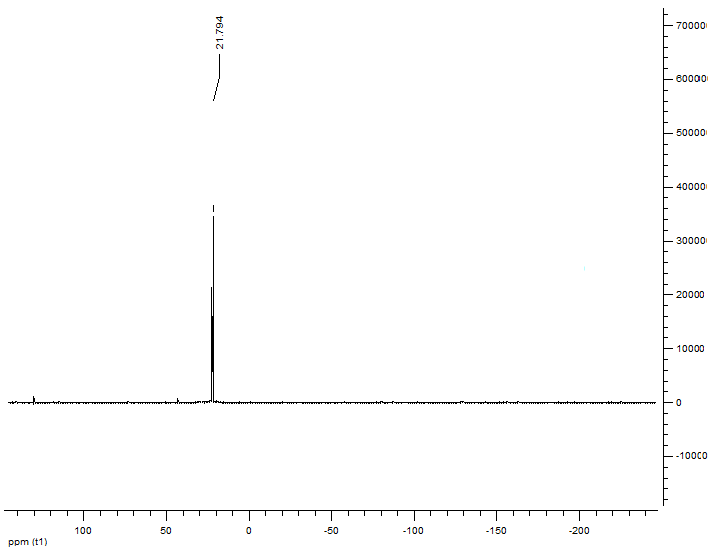
**

**Figure S 9:** 31P-NMR of Diethyl (3,4-dihydro-4-oxo-2-phenyl-2H-chromen-3-yl)(4-methoxyphenyl)methyl phosphonate


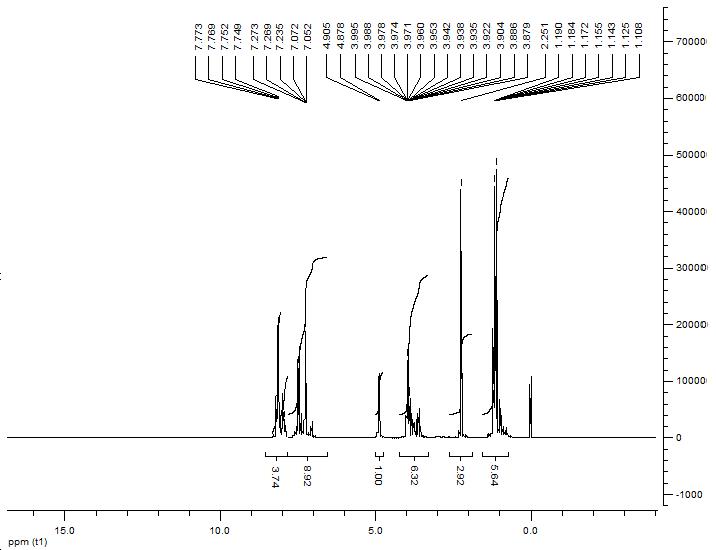


**Figure S 10:** 1H-NMR of Diethyl (3,4-dihydro-4-oxo-2-phenyl-2H-chromen-3-yl)(p-tolyl)methylphosphonate

**
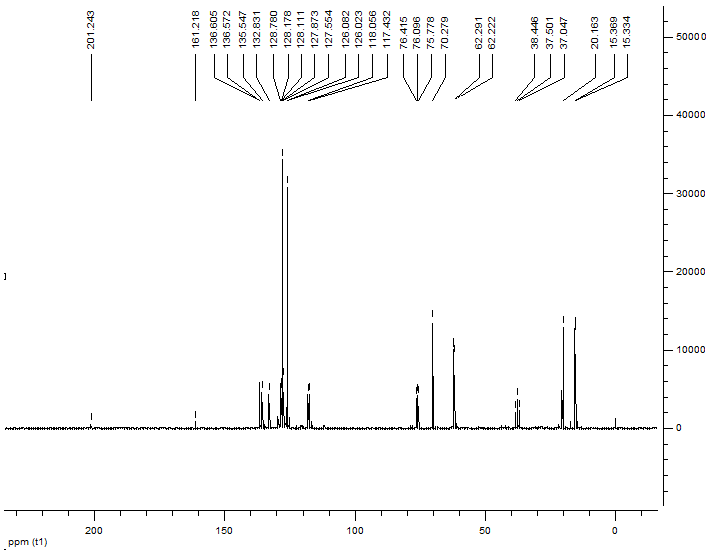
**

**Figure S 11**: 13C-NMR of Diethyl (3,4-dihydro-4-oxo-2-phenyl-2H-chromen-3-yl)(p-tolyl)methylphosphonate

**
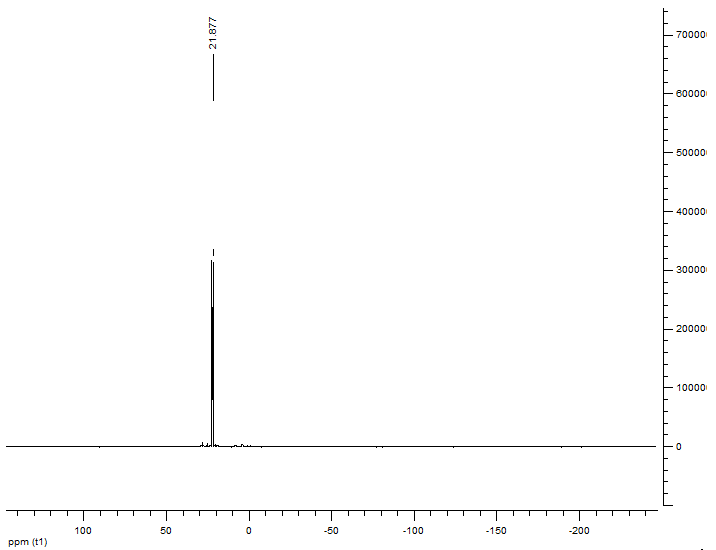
**

**Figure S 12:** 31P-NMR of Diethyl (3,4-dihydro-4-oxo-2-phenyl-2H-chromen-3-yl)(p-tolyl)methylphosphonate


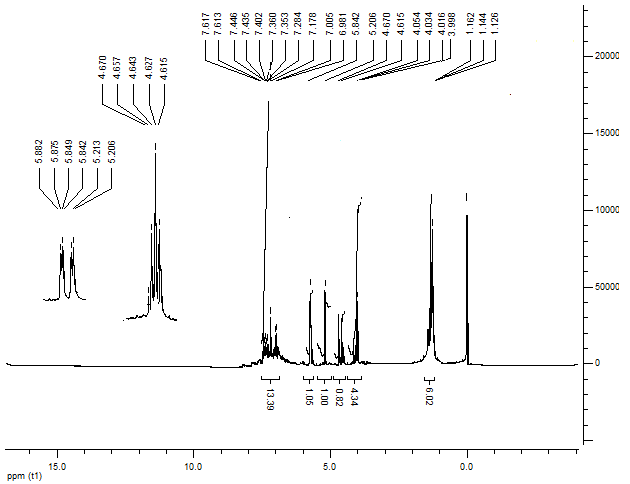


**Figure S 13:** 1H-NMR of Diethyl (3,4-dihydro-4-oxo-2-phenyl-2H-chromen-3-yl)(4-nitrophenyl)methylphosphonate


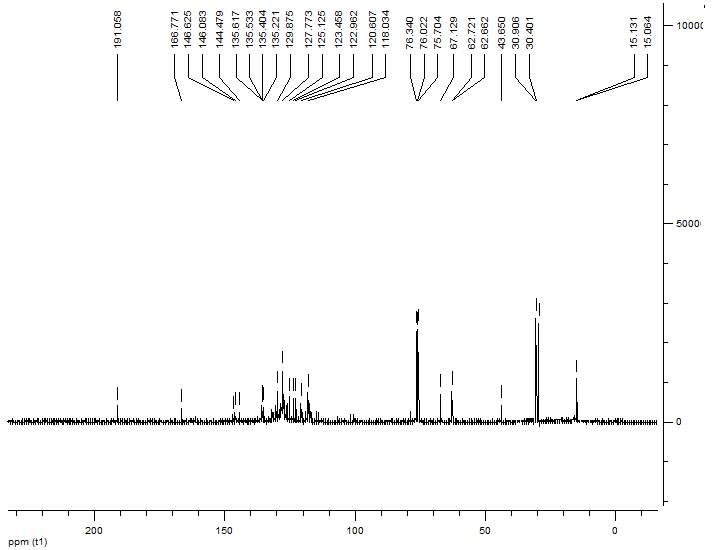


**Figure S 14**: 13C-NMR of Diethyl (3,4-dihydro-4-oxo-2-phenyl-2H-chromen-3-yl)(4-nitrophenyl)methyl phosphonate


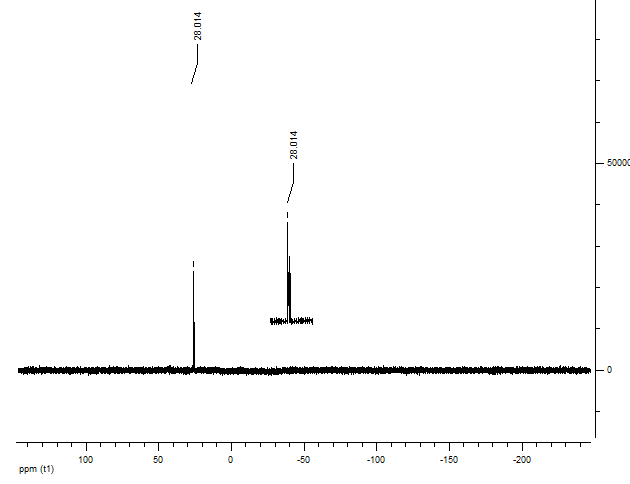


**Figure S 15:** 31P-NMR ofDiethyl (3,4-dihydro-4-oxo-2-phenyl-2H-chromen-3-yl)(4-nitrophenyl)methyl phosphonate


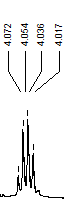

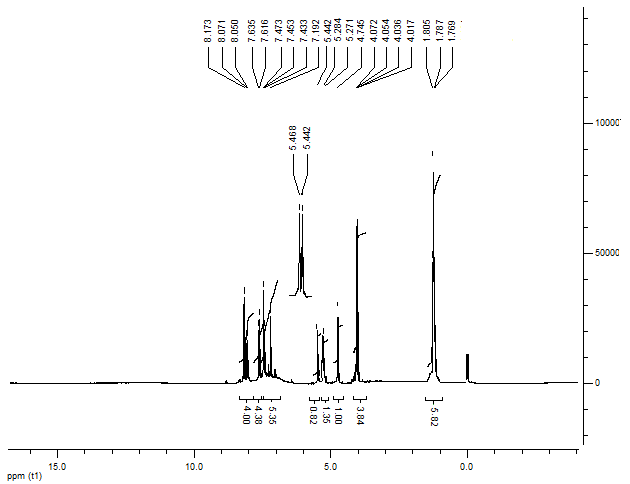


**Figure S 16:** 1H-NMR of Diethyl (3,4-dihydro-4-oxo-2-phenyl-2H-chromen-3-yl)(3-nitrophenyl)methylphosphonate

**
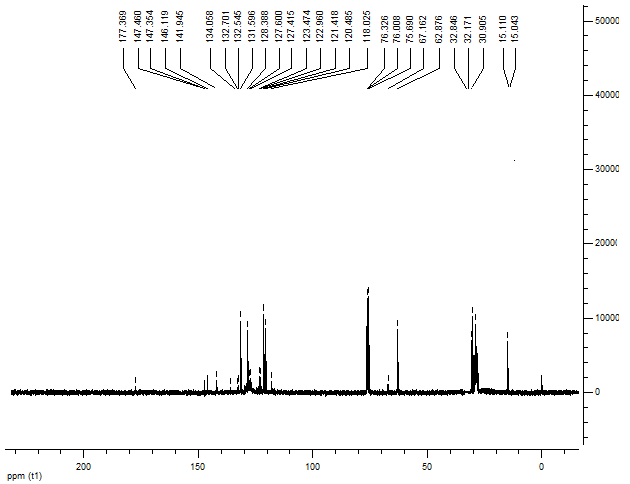
**

**Figure S 17:** 13C-NMR of Diethyl (3,4-dihydro-4-oxo-2-phenyl-2H-chromen-3-yl)(3-nitrophenyl)methyl phosphonate

**
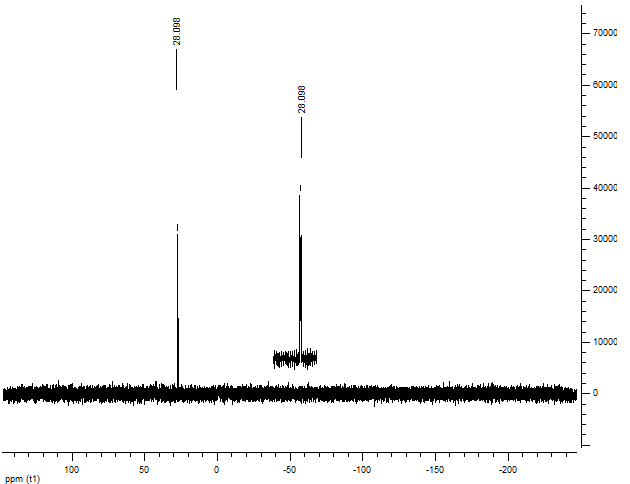
**

**Figure S 18**: 31P-NMR ofDiethyl (3,4-dihydro-4-oxo-2-phenyl-2H-chromen-3-yl)(3-nitrophenyl)methyl phosphonate


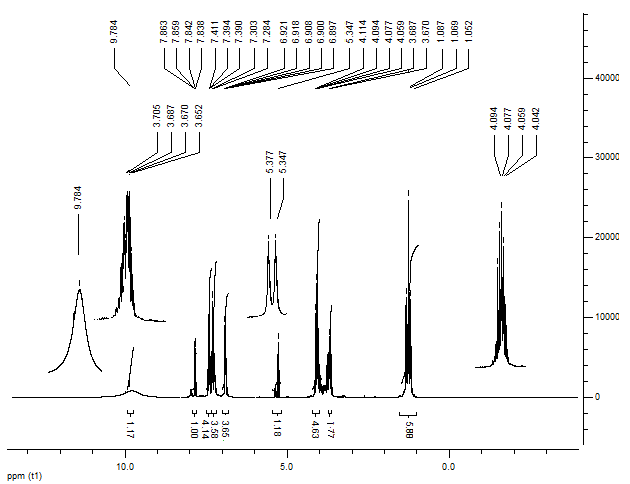


**Figure S 19:** 1H-NMR of Diethyl (3,4-dihydro-4-oxo-2-phenyl-2H-chromen-3-yl)(2-hydroxy-5-nitrophenyl)methylphosphonate


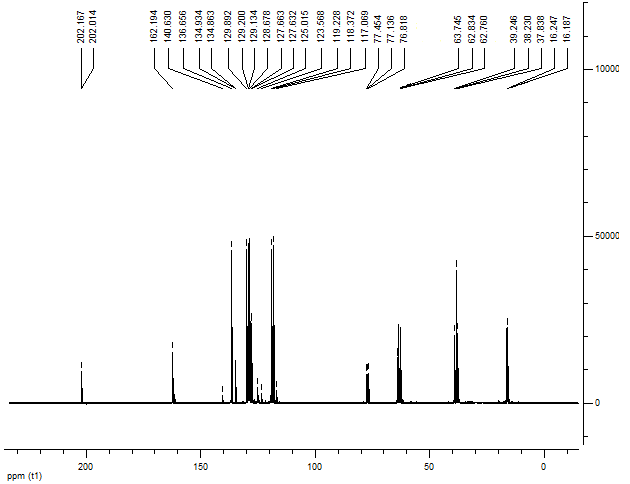


**Figure S 20**: 13C-NMR of Diethyl (3,4-dihydro-4-oxo-2-phenyl-2H-chromen-3-yl)(2-hydroxy-5-nitrophenyl)methylphosphonate


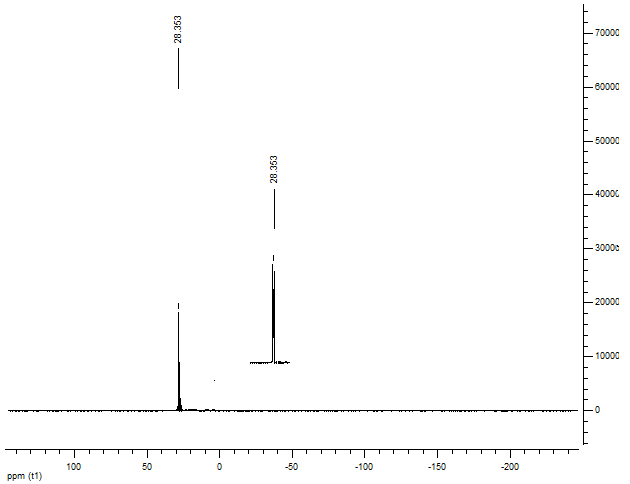


**Figure S 21:** 31P-NMR ofDiethyl (3,4-dihydro-4-oxo-2-phenyl-2H-chromen-3-yl)(2-hydroxy-5-nitrophenyl) methylphosphonate

**
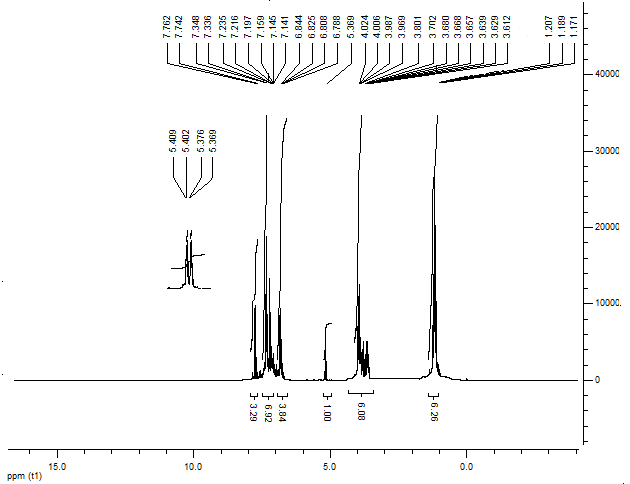
**

**Figure S 22:** 1H-NMR of Diethyl (4-fluorophenyl) (3,4-dihydro-4-oxo-2-phenyl-2H-chromen-3-yl)methyl phosphonate

**
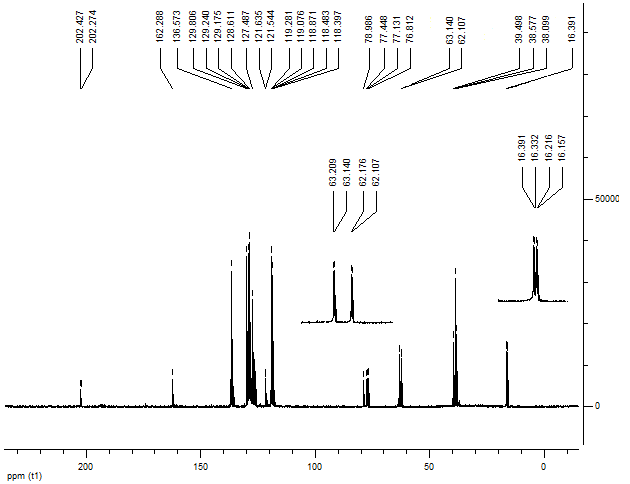
**

**Figure S 23**: 13C-NMR of Diethyl (4-fluorophenyl) (3,4-dihydro-4-oxo-2-phenyl-2H-chromen-3-yl)methyl phosphonate


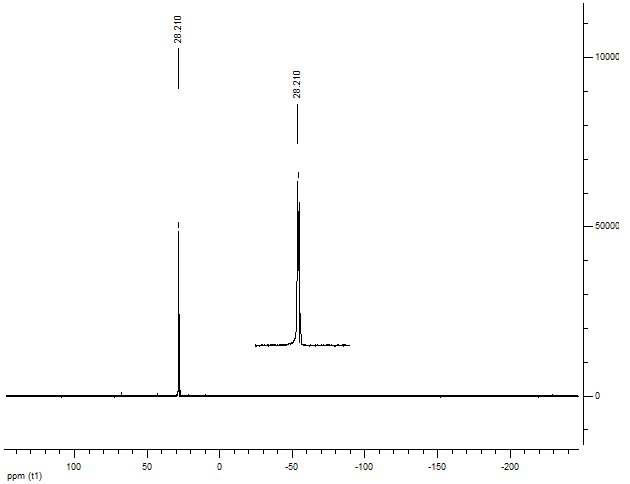


**Figure S 24:** 31P-NMR ofDiethyl (4-fluorophenyl) (3,4-dihydro-4-oxo-2-phenyl-2H-chromen-3-yl)methyl phosphonate


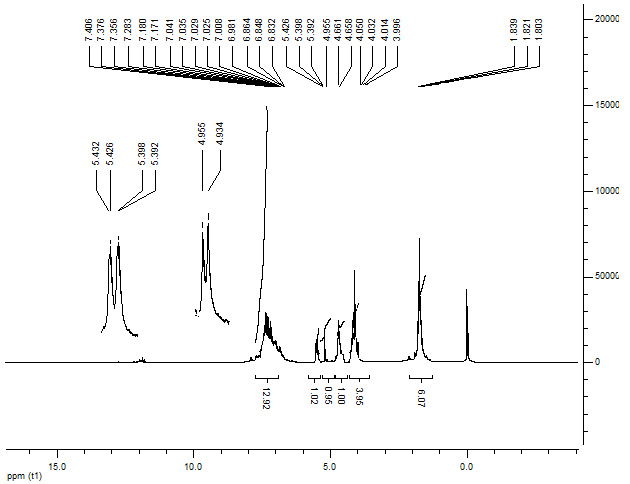


**Figure S 25:** 1H-NMR of Diethyl (4-chlorophenyl) (3,4-dihydro-4-oxo-2-phenyl-2H-chromen-3-yl)methylphosphonate


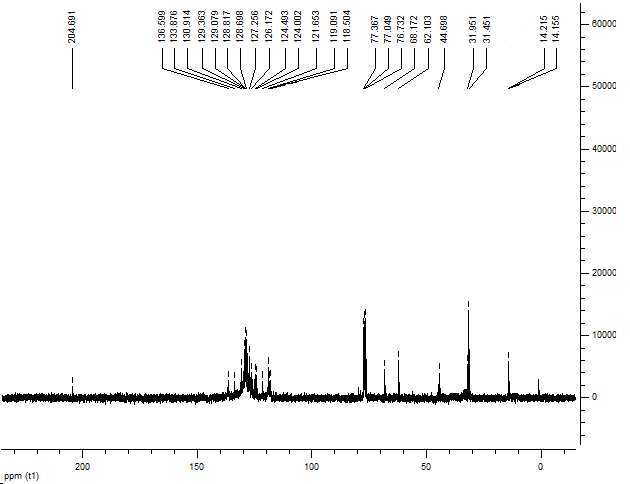


**Figure S 26:** 13C-NMR of Diethyl (4-chlorophenyl) (3,4-dihydro-4-oxo-2-phenyl-2H-chromen-3-yl)methyl phosphonate

**
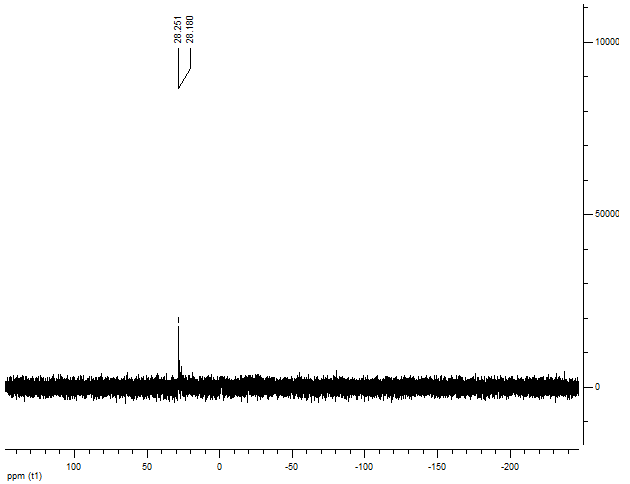
**

**Figure S 27:** 31P-NMR ofDiethyl (4-chlorophenyl) (3,4-dihydro-4-oxo-2-phenyl-2H-chromen-3-yl)methyl phosphonate


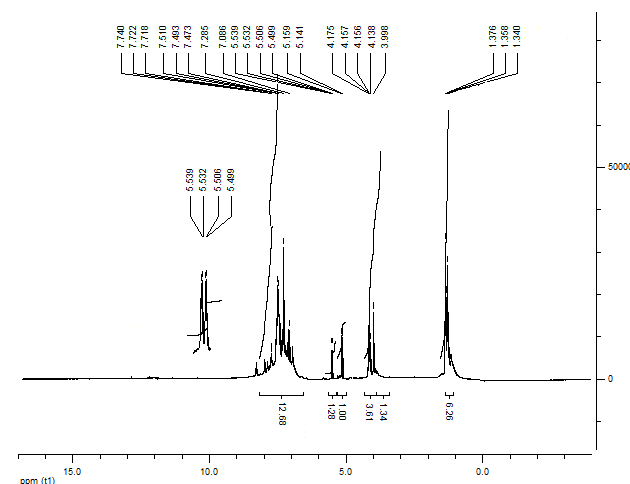


**Figure S 28**: 1H-NMR of Diethyl (2,4-dichlorophenyl)(3,4-dihydro-4-oxo-2-phenyl-2H-chromen-3-yl) methylphosphonate


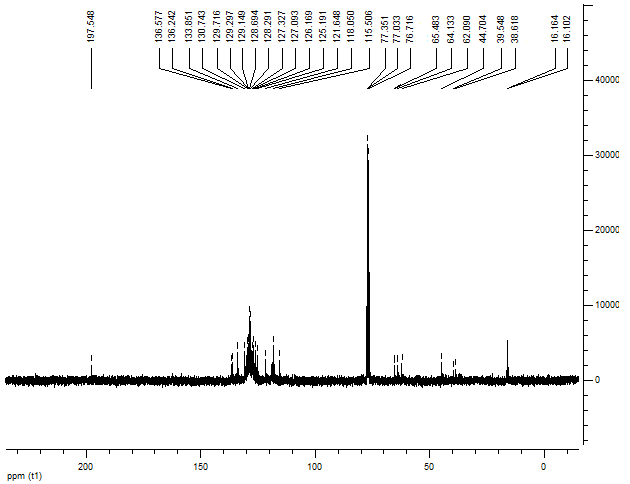


**Figure S 29**: 13C-NMR of Diethyl (2,4-dichlorophenyl)(3,4-dihydro-4-oxo-2-phenyl-2H-chromen-3-yl) methylphosphonate

**
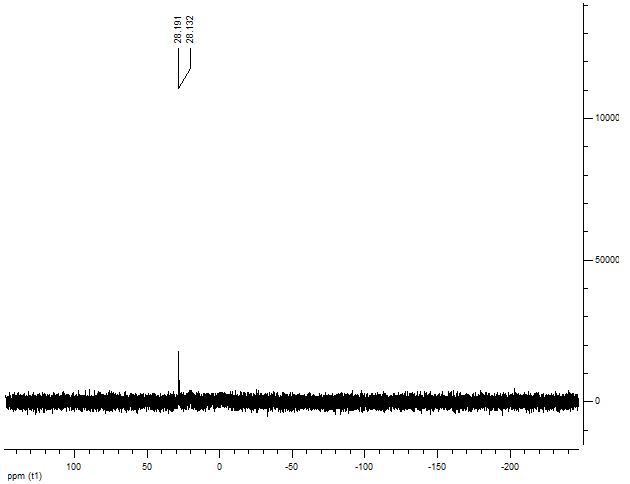
**

**Figure S 30**: 31P-NMR ofDiethyl (2,4-dichlorophenyl)(3,4-dihydro-4-oxo-2-phenyl-2H-chromen-3-yl) methylphosphonate


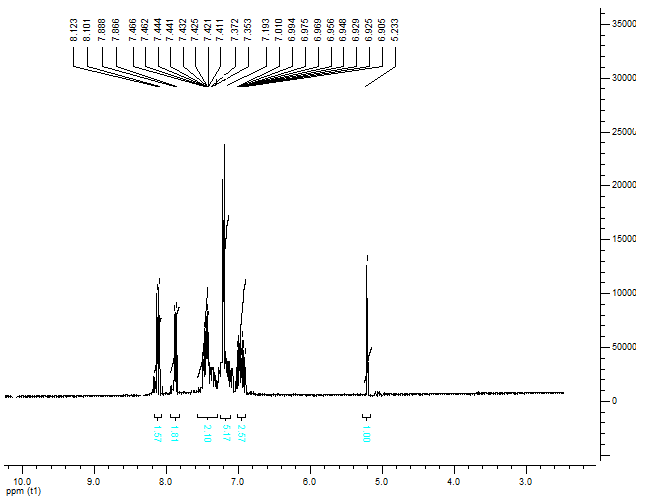


**Figure S 31**: 1H-NMR of3-(4-Nitrobenzylidene)-2,3-dihydro-2-phenylchromen-4-one
